# Supplementary material for: FASTmC: A Suite of Predictive Models for Nonreference-Based Estimations of DNA Methylation
Source: G3 (Bethesda). 2015 Dec 14;6(2):447–52. doi: 10.1534/g3.115.025668 (PMC4751562; doi:10.1534/g3.115.025668)
Supplement: Supporting Information [file supp_g3.115.025668_TableS1.xlsx]

## Sheet: Non-mammals
Species	GEO/SRA	CpG					CHG					CHH
		Sum of methylated target sites	Sum of un-methylated and unknown target sites	Estimator	Estimator divided by GC content	DNA methylation levels from standard WGBS	Sum of methylated target sites	Sum of un-methylated and unknown target sites	Estimator	Estimator divided by GC content	DNA methylation levels from standard WGBS	Sum of methylated target sites	Sum of un-methylated and unknown target sites	Estimator	Estimator divided by GC content	DNA methylation levels from standard WGBS
Aureococcus anophagefferens	SRR847292	32732	159572	0.17021	0.249783	0.222768	168	105839	0.0015848	0.0023257	0.00140147	507	170412	0.00296632	0.00435308	0.00135681
Bathycoccus prasinos	SRR1179200	7564	108893	0.064951	0.141736	0.216793	162	76883	0.00210267	0.00458845	0.00164641	308	262710	0.00117102	0.00255541	0.00155452
Chlamydomonas reinhardtii	SRR039324	8078	61475	0.116142	0.147313	0.170729	11213	25064	0.309094	0.392052	0.220903	42867	59295	0.419598	0.532215	0.495845
Chlorella NC64A	SRR042626	39474	69410	0.362533	0.531941	0.802191	1149	80833	0.0140153	0.0205645	0.015885	441	129343	0.00339795	0.00498579	0.00197371
Cyanidioschyzon merolae	SRR847294	246	139874	0.00175564	0.00337276	0.00196217	147	96139	0.0015267	0.00293295	0.00177311	380	245852	0.00154326	0.00296476	0.00189205
Emiliania huxleyi	SRR847299	13965	139435	0.0910365	0.147619	0.14658	2888	95912	0.0292308	0.0473988	0.0519865	654	212264	0.00307161	0.00498072	0.00274809
Fragilariopsis cylindrus	SRR847301	2469	99322	0.0242556	0.0600167	0.0710293	123	77555	0.00158346	0.00391803	0.00116543	404	281516	0.00143303	0.00354581	0.00109799
Micromonas pusilla	SRR847303	19500	148689	0.115941	0.192132	0.166167	134	87298	0.00153262	0.00253979	0.00115244	635	198232	0.00319309	0.00529145	0.00111772
Ostreococcus lucimarinus	SRR847306	26141	153455	0.145554	0.250388	0.214544	136	88903	0.00152742	0.00262753	0.00123474	371	201527	0.00183756	0.00316104	0.00119072
Phaeodactylum tricornutum	SRR847309	1256	122551	0.0101448	0.0213593	0.00706923	142	90434	0.00156774	0.00330079	0.00181767	593	268721	0.00220189	0.00463594	0.00197619
Thalassiosira pseudonana	SRR847311	1447	112430	0.0127067	0.0268818	0.0172081	87	82494	0.00105351	0.00222877	0.00113559	399	265067	0.00150302	0.00317972	0.00107247
Volvox carteri	SRR042659	1374	104622	0.0129628	0.0225828	0.0228558	163	73082	0.00222541	0.00387695	0.00081897	734	166654	0.00438502	0.00763928	0.000849822
Ciona intestinalis	SRR060811	4420	47603	0.0849624	0.202973	0.241667	--	--	--	--	--	--	--	--	--	--
Nematostella vectensis	SRR063322	1513	48540	0.030228	0.0653467	0.0998881	--	--	--	--	--	--	--	--	--	--
Postia placenta	SRR042649	6596	87986	0.0697384	0.125008	0.0387991	--	--	--	--	--	--	--	--	--	--
Tetraodon nigroviridis	SRR042654	16974	65503	0.205803	0.392449	0.654293	--	--	--	--	--	--	--	--	--	--
Coprinopsis cinerea	SRR042630	5760	83853	0.0642764	0.115601	0.0806692	--	--	--	--	--	--	--	--	--	--
Cryptococcus neoformans (WT)	SRR847298	866	108945	0.00788628	0.0164978	0.00718075	--	--	--	--	--	--	--	--	--	--
Laccaria bicolor	SRR042633	8414	76428	0.0991726	0.191998	0.130381	--	--	--	--	--	--	--	--	--	--
Phycomyces blakesleeanus	SRR042643	2754	63120	0.0418071	0.0974236	0.0142376	--	--	--	--	--	--	--	--	--	--
Uncinocarpus reesii	SRR042657	346	78347	0.00439683	0.00807484	0.00645059	--	--	--	--	--	--	--	--	--	--
Apis mellifera	SRR042620	350	53965	0.00644389	0.0148694	0.00513792	--	--	--	--	--	--	--	--	--	--
Bombyx mori	SRR042625	1141	79370	0.014172	0.0306946	0.00851555	--	--	--	--	--	--	--	--	--	--
Drosophila melanogaster	SRR042631	114	79406	0.0014336	0.00296077	0.00128124	--	--	--	--	--	--	--	--	--	--
Nasonia vitripennis	Nasonia_methylome	538	113105	0.00473412	0.00987422	0.0086099	--	--	--	--	--	--	--	--	--	--
Amborella trichopoda	SRR1168334	8847	41953	0.174154	0.347195	0.809066	7721	29141	0.209457	0.417576	0.606951	9092	110506	0.0760213	0.151557	0.132043
Arabidopsis lyrata	PRJEB6701	14860	88574	0.143666	0.30374	0.409626	8109	71260	0.102168	0.216005	0.210308	8982	251538	0.0344772	0.0728919	0.0648854
Arabidopsis thaliana	SRR342382	5038	45231	0.100221	0.260669	0.304511	1744	38681	0.0431416	0.112209	0.0999419	3097	175071	0.0173825	0.045211	0.039103
Arabidopsis thaliana (embryo; EM)	SRR017254	3452	37441	0.0844154	0.202781	0.262546	1743	31105	0.0530626	0.127466	0.103112	2844	128219	0.0216995	0.052126	0.0424323
Arabidopsis thaliana (sperm cell; SC)	SRR516178	16367	86214	0.159552	0.349792	0.312843	6085	72466	0.0774656	0.169831	0.118262	2379	267126	0.00882729	0.0193524	0.0145272
Arabidopsis thaliana (vegetative nucleus; VN)	SRR548295	8283	78414	0.0955396	0.250757	0.287931	3820	64221	0.0561426	0.147354	0.152945	10635	307634	0.0334151	0.0877026	0.0688763
Brachypodium distachyon	GSE72155	17915	85418	0.173372	0.397003	0.491718	7447	72787	0.092816	0.212539	0.191708	2042	297354	0.0068204	0.015618	0.0141436
Brassica oleracea	GSE72155	14287	71054	0.167411	0.457359	0.525776	6427	61808	0.0941892	0.257321	0.220062	6852	322436	0.0208085	0.056848	0.0511739
Capsella rubella	PRJEB6701	7468	92449	0.074742	0.166055	0.320081	2095	73488	0.0277179	0.0615809	0.0998407	3173	251351	0.0124664	0.0276967	0.0373286
Glycine max	SRR605670	16929	71690	0.191031	0.449137	0.710728	11113	54130	0.170332	0.400472	0.451616	5564	258354	0.0210823	0.049567	0.0509391
Mimulus guttatus	GSE72155	20553	72607	0.22062	0.592713	0.773629	8042	62189	0.114508	0.307634	0.361844	9977	310423	0.0311392	0.0836577	0.104945
Oryza sativa	SRR618545	15188	39690	0.276759	0.517999	0.583707	7298	29926	0.196056	0.36695	0.309453	3742	102957	0.0350706	0.0656402	0.0552263
Physcomitrella patens	SRR042646	3884	53787	0.0673475	0.181163	0.151864	4048	42714	0.086566	0.23286	0.15638	19565	202049	0.0882841	0.237482	0.173091
Populus trichocarpa	GSE72155	7239	70000	0.0937221	0.273859	0.43955	6470	56991	0.101952	0.297909	0.267839	6268	330377	0.018619	0.0544055	0.0501442
Selaginella moellendorffii	SRR042650	4061	82829	0.0467373	0.0880773	0.140792	2404	59125	0.039071	0.0736301	0.0914577	1155	175979	0.00652049	0.012288	0.00708962
Solanum lycopersicum	SRR503394	17303	74590	0.188295	0.463806	0.840509	11301	57882	0.163349	0.40236	0.548401	10203	295880	0.0333341	0.0821081	0.0835763
Sorghum bicolor	GSE72155	18657	77925	0.193173	0.45735	0.524993	11444	65275	0.149168	0.353166	0.271044	3705	306141	0.0119576	0.0283104	0.0210046
Zea mays	SRR408797	41861	58223	0.418259	0.695139	0.847591	28744	40020	0.418009	0.694724	0.732462	4091	148759	0.0267648	0.0444826	0.0581256
Leishmania major	SRR1179201	990	134001	0.00733382	0.0129732	0.0114941	663	82298	0.00799171	0.014137	0.0120789	2063	225334	0.00907224	0.0160484	0.0142287

## Sheet: Mammals
Species	GEO/SRA	CpG					CH
		Sum of methylated target sites	Sum of un-methylated and unknown target sites	Estimator	Estimator divided by GC content	DNA methylation levels from standard WGBS	Sum of methylated target sites	Sum of un-methylated and unknown target sites	Estimator	Estimator divided by GC content	DNA methylation levels from standard WGBS
Canis lupus familiaris	SRR652127	8203	77284	0.0959561	0.205894	0.650429	77774	275954	0.00320303	0.00687278	0.00167387
H1	SRR020282	5578	56026	0.0905461	0.20976	0.8349	53375	213067	0.00799424	0.0185196	0.0190799
Homo sapiens (fc, 64yr)	SRR921702_2	6352	66944	0.0866623	0.181124	0.784292	65549	226197	0.00864108	0.0180598	0.020345
Homo sapiens (fc, female, 53yr, NeuN, –)	SRR921719	6642	70960	0.0855906	0.216946	0.833796	69659	320613	0.00351806	0.00891721	0.00881011
Homo sapiens (fc, female, 53yr, NeuN, +)	SRR921705	8389	77201	0.0980138	0.199687	0.847224	70584	240170	0.0285982	0.0582641	0.0676888
Homo sapiens (fc, fetal)	SRR901381	9208	84455	0.0983099	0.189026	0.790931	78896	236582	0.00241855	0.00465028	0.00522199
Homo sapiens (fc, male, 55yr, NeuN, –)	SRR921742	6889	71839	0.0875038	0.221301	0.833568	70109	322203	0.00446583	0.0112943	0.010755
Homo sapiens (fc, male, 55yr, NeuN, +)	SRR921736	6733	69853	0.0879142	0.223116	0.862022	68561	316165	0.0246331	0.0625158	0.0604258
Homo sapiens (fc, male, 55yr, tissue)	SRR921724	8585	81100	0.0957239	0.206898	0.802213	74763	286528	0.00942177	0.0203642	0.020969
Homo sapiens (mfg, 12yr)	SRR901841	6783	71101	0.0870911	0.218119	0.828573	69273	315105	0.00733132	0.0183613	0.0176561
Homo sapiens (mfg, 16yr)	SRR901853	6703	70931	0.086341	0.216761	0.829769	69201	315516	0.00881427	0.0221284	0.0201023
Homo sapiens (mfg, 25yr)	SRR901865	6663	69183	0.0878491	0.222575	0.829369	68774	315042	0.00885841	0.0224437	0.0206396
Homo sapiens (mfg, 2yr)	SRR907566	6513	70756	0.0842899	0.211672	0.824644	69466	316294	0.00628888	0.0157929	0.0154814
Homo sapiens (mfg, 35do)	SRR907554	6392	70098	0.0835665	0.212071	0.81662	68047	313620	0.00334585	0.00849094	0.00839726
Homo sapiens (mfg, 5yr)	SRR905317	6638	69864	0.086769	0.219866	0.827384	68916	315659	0.00593642	0.0150425	0.0148042
HUES6	SRR921754	6724	67071	0.0911173	0.210851	0.861478	64991	253904	0.00700858	0.0162183	0.0172621
Mus musculus (bone marrow)	GSM1051150	7397	82919	0.0819013	0.175601	0.678553	77019	272090	0.00238894	0.00512201	--
Mus musculus (cerebellum)	GSM1051151	8246	76485	0.0973198	0.204135	0.7476	70828	245915	0.00656684	0.0137744	--
Mus musculus (colon)	GSM1051152	6870	75503	0.0834011	0.169702	0.747274	72325	240445	0.00348179	0.00708465	--
Mus musculus (cortex)	GSM1051153	5737	75012	0.0710473	0.154484	0.754094	72803	266656	0.00780949	0.0169808	--
Mus musculus (Dnmt3L deficient GV oocyte)	DRR001695	742	104155	0.00707361	0.0135999	0.0531409	63718	217213	0.0441212	0.0848283	--
Mus musculus (fc, 10wk)	SRR921785	8527	85257	0.0909217	0.18782	0.750471	78814	262349	0.00795221	0.0164272	0.0177797
Mus musculus (fc, 1wk)	SRR921767	6114	72622	0.0776519	0.18802	0.768914	71478	312578	0.00273918	0.00663244	0.00539376
Mus musculus (fc, 22mo)	SRR921806	6531	66564	0.0893495	0.199096	0.780545	63357	249374	0.0079781	0.0177774	0.0179396
Mus musculus (fc, 2wk)	SRR921694	8665	82611	0.0949319	0.189677	0.776821	76179	248666	0.00470686	0.00940447	0.0108508
Mus musculus (fc, 4wk)	SRR921697	7794	73919	0.0953826	0.199919	0.754065	68471	241292	0.0099108	0.0207727	0.0229913
Mus musculus (fc, 6wk)	SRR921778	7116	69550	0.0928182	0.201425	0.779424	65027	241935	0.00805311	0.0174761	0.0196164
Mus musculus (fc, female, 12mo, neun, –)	SRR921850	3502	34003	0.0933742	0.242567	0.786304	32761	148387	0.00346678	0.00900599	0.00821667
Mus musculus (fc, female, 12mo, neun, +)	SRR921842	8491	72747	0.10452	0.252837	0.784694	68075	296858	0.0102265	0.0247383	0.0265376
Mus musculus (fc, female, 6wk, neun, –)	SRR921840	8048	72704	0.0996632	0.241252	0.826281	68517	297866	0.00323705	0.00783586	0.00772182
Mus musculus (fc, female, 6wk, neun, +)	SRR921832	8034	73679	0.0983197	0.239082	0.767736	69147	303708	0.0103794	0.0252393	0.0265145
Mus musculus (fc, fetal)	SRR921759	8462	64898	0.115349	0.27398	0.821072	56580	231591	0.00216538	0.00514327	0.00446266
Mus musculus (fc, glia, S100b, +)	SRR921868	8672	72507	0.106826	0.210635	0.835266	66872	212538	0.00381518	0.00752263	0.00834261
Mus musculus (fc, male, 7wk, neun, –)	SRR921820	8698	72693	0.106867	0.257469	0.826007	66038	282776	0.00378425	0.00911721	0.00896116
Mus musculus (fc, male, 7wk, neun, +)	SRR921809	9766	71830	0.119687	0.287556	0.732906	62586	267344	0.0099415	0.0238851	0.0269507
Mus musculus (fc, tet2ko)	SRR921877	6875	66673	0.0934764	0.210556	0.788213	63367	254267	0.00742994	0.016736	0.0157203
Mus musculus (heart)	GSM1051154	5750	73219	0.0728134	0.167535	0.721022	69915	281470	0.00428874	0.00986787	--
Mus musculus (intestine)	GSM1051155	8371	73644	0.102067	0.219116	0.73825	69655	253465	0.00405422	0.00870355	--
Mus musculus (kidney)	GSM1051156	7873	74984	0.0950191	0.207701	0.74816	69828	259986	0.00475419	0.0103921	--
Mus musculus (liver)	GSM1051157	5351	67122	0.0738344	0.175595	0.746333	65268	270344	0.00408805	0.00972233	--
Mus musculus (lung)	GSM1051158	7752	80960	0.0873839	0.191537	0.729529	76278	284640	0.00333594	0.00731205	--
Mus musculus (olfactory bulb)	GSM1051159	6671	76048	0.0806465	0.170711	0.775813	72415	256133	0.00733835	0.0155337	--
Mus musculus (pancreas)	GSM1051160	7917	75894	0.0944625	0.204244	0.676407	70200	256212	0.0062559	0.0135263	--
Mus musculus (PGC)	ERR192344, ERR192345, ERR192346, ERR192347, ERR192348	2216	36319	0.0575062	0.112004	0.379468	31488	97923	0.0160651	0.0312897	0.0274119
Mus musculus (placenta)	GSM1051161	4103	73950	0.0525668	0.112972	0.486131	69719	250554	0.00394663	0.00848175	--
Mus musculus (skin)	GSM1051162	5998	72503	0.0764067	0.161948	0.717121	67594	238192	0.00421537	0.00893468	--
Mus musculus (spleen)	GSM1051163	7072	80843	0.0804413	0.185197	0.780353	74887	299585	0.00259833	0.00598202	--
Mus musculus (stomach)	GSM1051164	7786	76497	0.0923792	0.191233	0.714049	71571	245371	0.00458444	0.00949018	--
Mus musculus (thymus)	GSM1051165	8730	75491	0.103656	0.22051	0.818196	70544	251885	0.00352636	0.00750171	--
Mus musculus (uterus)	GSM1051166	7656	74650	0.0930187	0.201367	0.723198	70392	254857	0.00416911	0.00902532	--

## Sheet: Stroud
Species	GEO/SRA	CpG					CHG					CHH
		Sum of methylated target sites	Sum of un-methylated and unknown target sites	Estimator	Estimator divided by GC content	DNA methylation levels from standard WGBS	Sum of methylated target sites	Sum of un-methylated and unknown target sites	Estimator	Estimator divided by GC content	DNA methylation levels from standard WGBS	Sum of methylated target sites	Sum of un-methylated and unknown target sites	Estimator	Estimator divided by GC content	DNA methylation levels from standard WGBS
ago10	SRR534203	5767	42963	0.118346	0.262971	0.28089	1965	33780	0.0549727	0.122152	0.0907348	2477	125904	0.0192941	0.0428726	0.0279612
ago1	SRR534194	5368	44085	0.108548	0.235813	0.282575	2035	33973	0.0565152	0.122776	0.108031	2511	121205	0.0202965	0.0440928	0.0338861
ago2	SRR534195	5340	42399	0.111858	0.246065	0.274887	1843	32787	0.0532198	0.117072	0.0939092	2643	118641	0.0217918	0.0479375	0.0334866
ago3	SRR534196	6115	42807	0.124995	0.266841	0.313533	2137	32698	0.0613463	0.130963	0.113601	2531	113329	0.0218453	0.0466357	0.0346396
ago4	SRR534197	6024	44165	0.120026	0.249274	0.294596	2186	33389	0.0614476	0.127616	0.107785	2212	110167	0.0196834	0.040879	0.0317358
ago5	SRR534198	7066	46278	0.132461	0.26074	0.318244	2755	33004	0.0770435	0.151654	0.132975	3585	100411	0.0344725	0.0678565	0.0539057
ago6	SRR534199	6115	42807	0.124995	0.266841	0.321591	2137	32698	0.0613463	0.130963	0.118926	2531	113329	0.0218453	0.0466357	0.0359371
ago7	SRR534200	5187	41496	0.111111	0.248284	0.306525	1867	32404	0.0544775	0.121733	0.117691	3263	119700	0.0265364	0.0592973	0.0507122
ago8	SRR534201	5438	43682	0.110708	0.244439	0.28458	1735	34263	0.0481971	0.106417	0.0932775	2324	124238	0.0183625	0.0405436	0.0303773
ago9	SRR534202	8841	45195	0.163613	0.308313	0.392448	3409	33087	0.0934075	0.176017	0.184166	4506	93604	0.045928	0.0865468	0.0777303
clsy1	SRR534206	5867	42055	0.122428	0.270492	0.303058	2007	33252	0.0569216	0.125762	0.106304	2748	119778	0.0224279	0.0495521	0.0329773
cmt2	SRR869314	5438	43210	0.111783	0.227755	0.292287	1884	31192	0.0569597	0.116054	0.104436	1419	98199	0.0142444	0.0290227	0.0288833
cmt3	SRR534209	6481	45413	0.124889	0.252796	0.284446	575	35444	0.0159638	0.0323133	0.0189163	2895	106454	0.0264749	0.0535894	0.0302098
WT (r2)	SRR534177	7826	43964	0.15111	0.300269	0.300875	3009	32930	0.0837252	0.166369	0.114081	4159	100758	0.0396409	0.0787697	0.0541876
WT (r3)	SRR534193	5283	43816	0.107599	0.249831	0.259497	1935	34485	0.0531301	0.123361	0.0821853	3084	129951	0.0231819	0.0538253	0.03072
dcl2	SRR534210	5800	39288	0.128637	0.294521	0.331237	2293	31182	0.0684989	0.156831	0.139037	4590	118522	0.0372831	0.0853615	0.067057
dcl2+dcl3+dcl4	SRR534214	6994	44933	0.134689	0.271887	0.297648	2680	33808	0.0734488	0.148266	0.106125	3238	106284	0.0295648	0.0596804	0.0332385
dcl2+dcl4	SRR534213	5656	41889	0.118961	0.255701	0.326273	2448	31974	0.0711173	0.152863	0.136228	3592	111745	0.0311435	0.0669415	0.0514853
dcl3	SRR534211	6346	45843	0.121597	0.246171	0.3134	2386	34222	0.065177	0.13195	0.120819	2756	108726	0.0247215	0.0500483	0.0399892
dcl4	SRR534212	7701	45290	0.145327	0.287334	0.328363	3008	33236	0.082993	0.164091	0.141862	4387	99443	0.0422518	0.0835385	0.0597886
ddm1	SRR534215	1419	48911	0.0281939	0.0581554	0.105142	957	34855	0.0267229	0.0551211	0.0432911	3301	108061	0.0296421	0.0611424	0.0294856
drm1+drm2	SRR534222/3	6626	48801	0.119545	0.227794	0.281944	2454	34825	0.0658279	0.125436	0.0939497	3185	101680	0.0303724	0.0578749	0.023719
drm1+drm2+cmt3	SRR534224	5642	42631	0.116877	0.250588	0.295635	402	34267	0.0115954	0.0248609	0.0150099	2325	115034	0.019811	0.0424755	0.0227765
drm3	SRR534225	7539	45449	0.142277	0.274635	0.350808	2921	32864	0.0816264	0.157562	0.148461	3211	96264	0.0322795	0.0623084	0.0514566
ibm1	SRR534234	7033	44772	0.135759	0.276893	0.291713	2996	33111	0.0829756	0.169236	0.180368	3599	107329	0.0324445	0.0661735	0.045882
met1	SRR534239	437	50989	0.00849765	0.0178685	0.00550837	1347	35726	0.0363337	0.0764012	0.0766944	2356	118817	0.0194433	0.0408846	0.0240337
met1+cmt3	SRR534240	416	50284	0.00820513	0.017458	0.00552234	387	36009	0.010633	0.0226238	0.00830027	1992	118677	0.016508	0.0351238	0.0121667
met1 (+/-)	SRR534241	2870	43953	0.0612947	0.140456	0.145025	1620	33212	0.046509	0.106575	0.0857481	2989	125759	0.0232159	0.0531989	0.0313994
MET1 (+/+)	SRR534242	3439	44566	0.0716384	0.152287	0.173127	2154	31918	0.0632191	0.13439	0.125466	4094	108888	0.0362359	0.0770294	0.0555194
met2	SRR534243	5988	46266	0.114594	0.238691	0.270235	1766	36180	0.0465398	0.0969389	0.0900337	3093	117533	0.0256412	0.0534087	0.0379538
mom1	SRR534178	6249	48018	0.115153	0.2311	0.293051	2260	35907	0.0592135	0.118835	0.106988	2502	111490	0.0219489	0.0440492	0.0357842
nrpd1	SRR534180	4246	42187	0.0914436	0.212418	0.253096	1531	33261	0.0440044	0.102219	0.08486	1975	130978	0.0148549	0.0345069	0.0284535
nrpdb2	SRR534181	5676	45139	0.111699	0.243985	0.258194	1707	35549	0.0458181	0.100081	0.0803085	2152	125898	0.0168059	0.0367093	0.0217573
nrpe1	SRR534182	5572	43141	0.114384	0.240493	0.310793	2256	32398	0.0651007	0.136874	0.120397	2381	109402	0.0213002	0.0447836	0.0357484
rdd	SRR534183	6025	44330	0.11965	0.25297	0.323251	2350	33771	0.0650591	0.13755	0.124955	3412	114837	0.0288544	0.061005	0.0431581
rdr1	SRR534185	8772	46763	0.157954	0.29748	0.289228	3421	33653	0.0922749	0.173784	0.112493	4762	94598	0.0479267	0.0902618	0.0514192
rdr2	SRR534186	5764	42403	0.119667	0.254788	0.309947	2261	32579	0.0648967	0.138174	0.124932	2496	110378	0.0221132	0.0470821	0.0377588
rdr6	SRR534187	6536	45256	0.126197	0.258305	0.313097	2354	34375	0.064091	0.131184	0.118862	3000	108747	0.0268464	0.0549501	0.0456091
ref6	SRR534188	5465	44427	0.109537	0.241771	0.262499	1783	34735	0.0488252	0.107768	0.0787129	3167	125082	0.0246942	0.0545053	0.0325256
sde3	SRR534191	7376	44691	0.141664	0.287507	0.334673	2998	33326	0.082535	0.167505	0.142857	4469	106239	0.0403675	0.0819259	0.0590592
sde5	SRR534192	4816	43287	0.100118	0.218203	0.280766	1983	32911	0.0568293	0.123856	0.112372	3551	115236	0.0298938	0.0651521	0.0444116
sdg2	SRR534244	6193	46787	0.116893	0.239285	0.266609	2455	34832	0.0658406	0.134778	0.0956052	3020	112953	0.0260405	0.0533059	0.033729
sdg8	SRR534245	5180	45918	0.101374	0.216834	0.249843	2035	34741	0.055335	0.118359	0.100843	2395	119761	0.0196061	0.0419366	0.0303505
suvh4+suvh5+suvh6	SRR534253	5381	42295	0.112866	0.248218	0.282336	493	34106	0.014249	0.0313367	0.0187775	1724	119543	0.0142166	0.0312655	0.0196152
suvh4+kyp	SRR534250	5554	44095	0.111865	0.240261	0.287117	1240	34406	0.0347865	0.0747133	0.0491019	2453	117389	0.0204686	0.0439618	0.0266625
vim1+vim2+vim3	SRR534266	381	49424	0.00764983	0.0161162	0.00793535	1535	34002	0.0431944	0.0909991	0.10306	2731	114400	0.0233158	0.0491201	0.0324177

## Sheet: Norborg
A. thaliana ID	Population	Treatment – temperature (C)	GEO/SRA	CHH
				Estimator divided by GC content	FASTmC predicted DNA methylation level	DNA methylation levels from standard WGBS
5856	North	10	SRR1138746	0.0193166	0.0157859	0.0251076
6043	North	10	SRR1138783	0.0165556	0.0132912	0.0217565
6180	North	10	SRR1138917	0.0151904	0.0120577	0.0242703
6209	North	10	SRR1138946	0.0145734	0.0115002	0.0214459
6231	North	10	SRR1138956	0.0154669	0.0123075	0.0262083
6244	North	10	SRR1138973	0.0185698	0.0151112	0.025099
8376	North	10	SRR1139067	0.0170117	0.0137033	0.0230581
9371	North	10	SRR1139127	0.016623	0.0133521	0.022867
5856	North	16	SRR1138748	0.0163579	0.0131126	0.0123954
6043	North	16	SRR1138787	0.0172837	0.0139491	0.0251936
6180	North	16	SRR1138918	0.0179196	0.0145237	0.0286047
6209	North	16	SRR1138947	0.0171529	0.0138309	0.0276392
6231	North	16	SRR1138958	0.01689	0.0135934	0.0320014
6244	North	16	SRR1138974	0.018298	0.0148655	0.0279091
8376	North	16	SRR1139070	0.020509	0.0168632	0.0234828
9371	North	16	SRR1139128	0.0168998	0.0136022	0.0236316
6034	South	10	SRR1138768	0.0140183	0.0109987	0.0208207
6076	South	10	SRR1138806	0.0155626	0.012394	0.0222132
6100	South	10	SRR1138830	0.012621	0.0097362	0.0199551
6973	South	10	SRR1138996	0.0144042	0.0113474	0.0196207
8237	South	10	SRR1139018	0.018342	0.0149053	0.0189141
8241	South	10	SRR1139024	0.0135366	0.0105634	0.0195621
8242	South	10	SRR1139028	0.0167713	0.0134862	0.0296281
8256	South	10	SRR1139035	0.0109694	0.00824393	0.0163941
6034	South	16	SRR1138770	0.0175852	0.0142215	0.0288155
6076	South	16	SRR1138808	0.0206105	0.016955	0.0290423
6100	South	16	SRR1138832	0.016908	0.0136096	0.0248645
6973	South	16	SRR1138998	0.0155065	0.0123433	0.0195803
8237	South	16	SRR1139020	0.0249014	0.0208319	0.0346857
8241	South	16	SRR1139026	0.0166554	0.0133814	0.0216326
8242	South	16	SRR1139029	0.0210877	0.0173861	0.0312886
8256	South	16	SRR1139038	0.0106552	0.00796003	0.0180906

## Sheet: GC content from WGBS
Species	Estimated from WGBS data	True GC content	Difference
Amborella trichopoda	0.501601	0.374722	0.126879
Apis mellifera	0.433365	0.339828	0.0935373
Arabidopsis lyrata	0.472991	0.360858	0.112133
Arabidopsis thaliana	0.384475	0.360559	0.0239161
Arabidopsis thaliana (embryo; EM)	0.416289	0.360559	0.0557305
Arabidopsis thaliana (sperm cell; SC)	0.456134	0.360559	0.0955757
Arabidopsis thaliana (vegetative nucleus; VN)	0.381005	0.360559	0.0204464
Aureococcus anophagefferens	0.681429	0.695022	0.0135926
Bathycoccus prasinos	0.458252	0.480273	0.0220208
Bombyx mori	0.461709	0.376758	0.0849503
Brachypodium distachyon	0.4367	0.464045	0.0273451
Brassica oleracea	0.366038	0.360664	0.00537456
Canis lupus familiaris	0.466045	0.415858	0.0501875
Capsella rubella	0.450105	0.35633	0.093775
Chlamydomonas reinhardtii	0.478019	0.482113	0.00409358
Chlorella NC64A	0.681527	0.670418	0.0111093
Ciona intestinalis	0.41859	0.357696	0.0608939
Coprinopsis cinerea	0.556019	0.516405	0.039614
Cryptococcus neoformans (WT)	0.788399	0.640242	0.148158
Cyanidioschyzon merolae	0.520535	0.549638	0.0291033
Drosophila melanogaster	0.484199	0.420062	0.0641372
Emiliania huxleyi	0.616699	0.656511	0.0398119
Fragilariopsis cylindrus	0.404147	0.385002	0.0191451
Glycine max	0.42533	0.34762	0.0777094
H1	0.431664	0.403509	0.0281559
Homo sapiens (fc, 64yr)	0.47847	0.403509	0.0749611
Homo sapiens (fc, female, 53yr, NeuN, –)	0.394525	0.403509	0.00898407
Homo sapiens (fc, female, 53yr, NeuN, +)	0.490837	0.403509	0.0873288
Homo sapiens (fc, fetal)	0.520087	0.403509	0.116579
Homo sapiens (fc, male, 55yr, NeuN, –)	0.395406	0.403509	0.00810216
Homo sapiens (fc, male, 55yr, NeuN, +)	0.39403	0.403509	0.00947863
Homo sapiens (fc, male, 55yr, tissue)	0.462663	0.403509	0.0591545
Homo sapiens (mfg, 12yr)	0.399282	0.403509	0.00422679
Homo sapiens (mfg, 16yr)	0.398324	0.403509	0.00518439
Homo sapiens (mfg, 25yr)	0.394695	0.403509	0.00881384
Homo sapiens (mfg, 2yr)	0.398209	0.403509	0.00529914
Homo sapiens (mfg, 35do)	0.394049	0.403509	0.00945924
Homo sapiens (mfg, 5yr)	0.394644	0.403509	0.00886469
HUES6	0.43214	0.403509	0.028631
Laccaria bicolor	0.516529	0.469461	0.0470675
Leishmania major	0.565306	0.597198	0.0318925
Micromonas pusilla	0.603443	0.659015	0.0555711
Mimulus guttatus	0.372222	0.354266	0.017956
Mus musculus (bone marrow)	0.466407	0.412005	0.0544018
Mus musculus (cerebellum)	0.476742	0.412005	0.0647374
Mus musculus (colon)	0.491456	0.412005	0.0794507
Mus musculus (cortex)	0.459901	0.412005	0.0478963
Mus musculus (Dnmt3L deficient GV oocyte)	0.520123	0.412005	0.108118
Mus musculus (fc, 10wk)	0.484089	0.412005	0.0720838
Mus musculus (fc, 1wk)	0.412998	0.412005	0.000993117
Mus musculus (fc, 22mo)	0.448777	0.412005	0.0367719
Mus musculus (fc, 2wk)	0.500492	0.412005	0.0884867
Mus musculus (fc, 4wk)	0.477107	0.412005	0.0651025
Mus musculus (fc, 6wk)	0.460807	0.412005	0.048802
Mus musculus (fc, female, 12mo, neun, –)	0.384941	0.412005	0.0270635
Mus musculus (fc, female, 12mo, neun, +)	0.413389	0.412005	0.00138359
Mus musculus (fc, female, 6wk, neun, –)	0.413107	0.412005	0.0011024
Mus musculus (fc, female, 6wk, neun, +)	0.411239	0.412005	0.000765923
Mus musculus (fc, fetal)	0.421012	0.412005	0.0090074
Mus musculus (fc, glia, S100b, +)	0.507161	0.412005	0.0951556
Mus musculus (fc, male, 7wk, neun, –)	0.415067	0.412005	0.00306206
Mus musculus (fc, male, 7wk, neun, +)	0.416222	0.412005	0.00421696
Mus musculus (fc, tet2ko)	0.44395	0.412005	0.031945
Mus musculus (heart)	0.434617	0.412005	0.0226119
Mus musculus (intestine)	0.465812	0.412005	0.0538073
Mus musculus (kidney)	0.457481	0.412005	0.0454762
Mus musculus (liver)	0.420481	0.412005	0.0084758
Mus musculus (lung)	0.456225	0.412005	0.0442199
Mus musculus (olfactory bulb)	0.472415	0.412005	0.06041
Mus musculus (pancreas)	0.462499	0.412005	0.0504937
Mus musculus (PGC)	0.513431	0.412005	0.101426
Mus musculus (placenta)	0.465309	0.412005	0.0533039
Mus musculus (skin)	0.471798	0.412005	0.0597933
Mus musculus (spleen)	0.434356	0.412005	0.0223506
Mus musculus (stomach)	0.483072	0.412005	0.0710666
Mus musculus (thymus)	0.470074	0.412005	0.0580692
Mus musculus (uterus)	0.461935	0.412005	0.0499303
Nasonia vitripennis	0.479443	0.418207	0.0612359
Nematostella vectensis	0.462578	0.406351	0.0562271
Oryza sativa	0.534285	0.435686	0.0985994
Ostreococcus lucimarinus	0.581315	0.604373	0.0230575
Phaeodactylum tricornutum	0.474961	0.487634	0.0126736
Phycomyces blakesleeanus	0.429127	0.357844	0.0712829
Physcomitrella patens	0.371751	0.337289	0.0344622
Populus trichocarpa	0.342227	0.337465	0.00476164
Postia placenta	0.557874	0.538072	0.0198015
Selaginella moellendorffii	0.530639	0.452506	0.0781332
Solanum lycopersicum	0.405978	0.340577	0.0654009
Sorghum bicolor	0.422373	0.439244	0.0168707
Tetraodon nigroviridis	0.524406	0.46389	0.0605167
Thalassiosira pseudonana	0.472688	0.468508	0.00418029
Uncinocarpus reesii	0.54451	0.486586	0.0579237
Volvox carteri	0.57401	0.560633	0.0133763
Zea mays	0.601691	0.468913	0.132778
Average			0.0456193
Standard deviation			0.0351909

## Sheet: Sequence context frequency
Species	Estimated context from reference genome				Estimated context from genomic data
	CG	CHG	CHH	CH	CG	CHG	CHH	CH
Amborella trichopoda	0.223103	0.339794	0.416655	--	0.211993	0.328982	0.412026	--
Apis mellifera	0.507903	--	--	--	0.517073	--	--	--
Arabidopsis lyrata	0.292943	0.362145	0.377822	--	0.293163	0.367578	0.379101	--
Arabidopsis thaliana	0.269882	0.363262	0.383395	--	0.265793	0.362689	0.382345	--
Aureococcus anophagefferens	0.798604	0.58221	0.644746	--	0.825278	0.588652	0.669189	--
Bathycoccus prasinos	0.631117	0.375142	0.434999	--	0.643568	0.375216	0.439359	--
Bombyx mori	0.407638	--	--	--	0.397255	--	--	--
Brachypodium distachyon	0.394284	0.492407	0.482563	--	0.391001	0.493333	0.480796	--
Brassica oleracea	0.304989	0.374079	0.372624	--	0.306246	0.374593	0.373157	--
Canis lupus familiaris	0.144438	--	--	0.469432	0.141988	--	--	0.470553
Capsella rubella	0.26565	0.361069	0.377812	--	0.266405	0.371737	0.379171	--
Chlamydomonas reinhardtii	0.529589	0.720162	0.683854	--	0.532301	0.723424	0.686493	--
Chlorella NC64A	0.498698	0.796139	0.732863	--	0.50374	0.80254	0.74133	--
Ciona intestinalis	0.295743	--	--	--	0.294595	--	--	--
Coprinopsis cinerea	0.488667	--	--	--	0.483484	--	--	--
Cryptococcus neoformans (WT)	0.418461	--	--	--	0.418145	--	--	--
Cyanidioschyzon merolae	0.557159	0.565471	0.538177	--	0.558703	0.562402	0.537503	--
Drosophila melanogaster	0.378453	--	--	--	0.382724	--	--	--
Emiliania huxleyi	0.662997	0.635733	0.661447	--	0.665712	0.640933	0.663375	--
Fragilariopsis cylindrus	0.342888	0.368498	0.40277	--	0.349424	0.369089	0.40403	--
Glycine max	0.205156	0.324717	0.384347	--	0.205243	0.320058	0.393225	--
Homo sapiens	0.11906	--	--	0.456119	0.12176	--	--	0.470748
Laccaria bicolor	0.383571	--	--	--	0.380542	--	--	--
Leishmania major	0.553361	0.627103	0.612648	--	0.59684	0.667293	0.657681	--
Micromonas pusilla	0.814403	0.528621	0.559458	--	0.831272	0.537559	0.576067	--
Mimulus guttatus	0.331211	0.331142	0.364231	--	0.341915	0.338452	0.366873	--
Mus musculus	0.109069	--	--	0.472289	0.102975	--	--	0.463554
Nasonia vitripennis	0.513978	--	--	--	0.557016	--	--	--
Nematostella vectensis	0.327599	--	--	--	0.33153	--	--	--
Oryza sativa	0.386736	0.455064	0.447376	--	0.392212	0.46236	0.448001	--
Ostreococcus lucimarinus	0.758094	0.426923	0.536596	--	0.753641	0.428513	0.537229	--
Phaeodactylum tricornutum	0.488398	0.460878	0.4972	--	0.484033	0.45902	0.495879	--
Phycomyces blakesleeanus	0.250404	--	--	--	0.249876	--	--	--
Physcomitrella patens	0.217658	0.286194	0.373478	--	0.218667	0.283119	0.373403	--
Populus trichocarpa	0.194923	0.357142	0.365982	--	0.189878	0.350124	0.363215	--
Postia placenta	0.515008	--	--	--	0.517659	--	--	--
Selaginella moellendorffii	0.351979	0.42793	0.492963	--	0.348992	0.420945	0.490087	--
Solanum lycopersicum	0.205509	0.286586	0.379987	--	0.200404	0.289668	0.376668	--
Sorghum bicolor	0.344162	0.43339	0.472258	--	0.358472	0.449877	0.464929	--
Tetraodon nigroviridis	0.298021	--	--	--	0.26726	--	--	--
Thalassiosira pseudonana	0.372484	0.428721	0.521469	--	0.37511	0.43027	0.51919	--
Uncinocarpus reesii	0.439427	--	--	--	0.44749	--	--	--
Volvox carteri	0.473011	0.627631	0.582389	--	0.47826	0.635801	0.588645	--
Zea mays	0.398189	0.456384	0.498032	--	0.398874	0.455269	0.49958	--

## Sheet: All models
Context	Correction	Preference	Samples/species	N	Number of WGBS reads	y ~ x	MAPE (%)
CH (mammal)	GC content	Preferred	Canis lupus familiaris, H1, Homo sapiens (fc, 64yr), Homo sapiens (fc, female, 53yr, NeuN, –), Homo sapiens (fc, female, 53yr, NeuN, +), Homo sapiens (fc, fetal), Homo sapiens (fc, male, 55yr, NeuN, –), Homo sapiens (fc, male, 55yr, NeuN, +), Homo sapiens (fc, male, 55yr, tissue), Homo sapiens (mfg, 12yr), Homo sapiens (mfg, 16yr), Homo sapiens (mfg, 25yr), Homo sapiens (mfg, 2yr), Homo sapiens (…	32	10000	y = -0.000892 + 1.062944	0.152 ± 0.167
CHG	GC content	Preferred	Aureococcus anophagefferens, Bathycoccus prasinos, Chlamydomonas reinhardtii, Chlorella NC64A, Cyanidioschyzon merolae, Emiliania huxleyi, Fragilariopsis cylindrus, Micromonas pusilla, Ostreococcus lucimarinus, Phaeodactylum tricornutum, Thalassiosira pseudonana, Volvox carteri, Amborella trichopoda, Arabidopsis lyrata, Arabidopsis thaliana, Arabidopsis thaliana (embryo; EM), Arabidopsis thaliana…	30	10000	y = -0.00986 + 1.04492x	3.90 ± 4.90
CHH	GC content	Preferred	Aureococcus anophagefferens, Bathycoccus prasinos, Chlamydomonas reinhardtii, Chlorella NC64A, Cyanidioschyzon merolae, Emiliania huxleyi, Fragilariopsis cylindrus, Micromonas pusilla, Ostreococcus lucimarinus, Phaeodactylum tricornutum, Thalassiosira pseudonana, Volvox carteri, Amborella trichopoda, Arabidopsis lyrata, Arabidopsis thaliana, Arabidopsis thaliana (embryo; EM), Arabidopsis thaliana…	30	10000	y = -0.00167 + 0.90353x	0.723 ± 1.18
CpG (all mammal)	GC content	Preferred	Canis lupus familiaris, H1, Homo sapiens (fc, 64yr), Homo sapiens (fc, female, 53yr, NeuN, –), Homo sapiens (fc, female, 53yr, NeuN, +), Homo sapiens (fc, fetal), Homo sapiens (fc, male, 55yr, NeuN, –), Homo sapiens (fc, male, 55yr, NeuN, +), Homo sapiens (fc, male, 55yr, tissue), Homo sapiens (mfg, 12yr), Homo sapiens (mfg, 16yr), Homo sapiens (mfg, 25yr), Homo sapiens (mfg, 2yr), Homo sapiens (…	49	10000	y = 0.426 + 1.670x	5.03 ± 4.18
CpG (all mammal)	Sequence context	--	Canis lupus familiaris, H1, Homo sapiens (fc, 64yr), Homo sapiens (fc, female, 53yr, NeuN, –), Homo sapiens (fc, female, 53yr, NeuN, +), Homo sapiens (fc, fetal), Homo sapiens (fc, male, 55yr, NeuN, –), Homo sapiens (fc, male, 55yr, NeuN, +), Homo sapiens (fc, male, 55yr, tissue), Homo sapiens (mfg, 12yr), Homo sapiens (mfg, 16yr), Homo sapiens (mfg, 25yr), Homo sapiens (mfg, 2yr), Homo sapiens (…	49	10000	y = 0.288 + 1.027x	5.51 ± 4.96
CpG (all)	GC content	--	Aureococcus anophagefferens, Bathycoccus prasinos, Chlamydomonas reinhardtii, Chlorella NC64A, Cyanidioschyzon merolae, Emiliania huxleyi, Fragilariopsis cylindrus, Micromonas pusilla, Ostreococcus lucimarinus, Phaeodactylum tricornutum, Thalassiosira pseudonana, Volvox carteri, Ciona intestinalis, Nematostella vectensis, Postia placenta, Tetraodon nigroviridis, Coprinopsis cinerea, Cryptococcus …	93	10000	y = 0.261 + 1.303x	25.50 ± 7.30
CpG (no mammal)	GC content	Preferred	Aureococcus anophagefferens, Bathycoccus prasinos, Chlamydomonas reinhardtii, Chlorella NC64A, Cyanidioschyzon merolae, Emiliania huxleyi, Fragilariopsis cylindrus, Micromonas pusilla, Ostreococcus lucimarinus, Phaeodactylum tricornutum, Thalassiosira pseudonana, Volvox carteri, Ciona intestinalis, Nematostella vectensis, Postia placenta, Tetraodon nigroviridis, Coprinopsis cinerea, Cryptococcus …	44	10000	y = -0.02622 + 1.39531x	6.46 ± 6.59
CpG (no mammal)	Sequence context	--	Aureococcus anophagefferens, Bathycoccus prasinos, Chlamydomonas reinhardtii, Chlorella NC64A, Cyanidioschyzon merolae, Emiliania huxleyi, Fragilariopsis cylindrus, Micromonas pusilla, Ostreococcus lucimarinus, Phaeodactylum tricornutum, Thalassiosira pseudonana, Volvox carteri, Ciona intestinalis, Nematostella vectensis, Postia placenta, Tetraodon nigroviridis, Coprinopsis cinerea, Cryptococcus …	44	10000	y = -0.0458 + 1.4099x	5.72 ± 5.39

## Sheet: Esitmator sampling
Species	CpG								CHG								CHH								CH
	1	10	100	1000	10000	100000	1000000	10000000	1	10	100	1000	10000	100000	1000000	10000000	1	10	100	1000	10000	100000	1000000	10000000	1	10	100	1000	10000	100000	1000000	10000000
Amborella trichopoda	0.5	0.217391	0.204934	0.181406	0.174154	0.176074	0.175902	0.175771	0.5	0.171429	0.257703	0.205001	0.209457	0.210203	0.210497	0.210839	0.2	0.0655738	0.0544554	0.067625	0.0760213	0.0752543	0.0757016	0.0756791	--	--	--	--	--	--	--	--
Apis mellifera	0	0.0192308	0.00391389	0.00722222	0.00644389	0.00663992	0.00660326	0.0066424	--	--	--	--	--	--	--	--	--	--	--	--	--	--	--	--	--	--	--	--	--	--	--	--
Arabidopsis lyrata	0.0714286	0.219298	0.164762	0.149081	0.143666	0.141349	0.142755	0.14286	0.222222	0.188235	0.115614	0.107808	0.102168	0.100353	0.100854	0.100618	0	0.0647773	0.0474893	0.0337989	0.0344772	0.0337379	0.0340176	0.0339866	--	--	--	--	--	--	--	--
Arabidopsis thaliana	0.25	0.156863	0.0705009	0.109255	0.100221	0.0972017	0.0971013	0.0967925	0	0.0227273	0.0394089	0.042409	0.0431416	0.0431882	0.0434003	0.0431421	0	0.0225989	0.0137438	0.0181204	0.0173825	0.0176794	0.0179099	0.0178462	--	--	--	--	--	--	--	--
Aureococcus anophagefferens	0	0.106481	0.161847	0.171025	0.17021	0.166765	0.166324	0.166488	0	0	0.00094697	0.00141924	0.0015848	0.00152433	0.00149369	0.0015133	0	0.00769231	0.00129534	0.00159095	0.00296632	0.0022869	0.00240299	0.00234037	--	--	--	--	--	--	--	--
Bathycoccus prasinos	0.047619	0.0188679	0.0746528	0.0665381	0.064951	0.0654068	0.06512	0.0648576	0	0	0	0.00142542	0.00210267	0.00206549	0.0021161	0.00212053	0	0	0.00117555	0.00119689	0.00117102	0.00124016	0.00125638	0.00125613	--	--	--	--	--	--	--	--
Bombyx mori	0	0	0.00727273	0.00845561	0.014172	0.0137582	0.01338	0.0133939	--	--	--	--	--	--	--	--	--	--	--	--	--	--	--	--	--	--	--	--	--	--	--	--
Brachypodium distachyon	0	0.208333	0.169953	0.186842	0.173372	0.171957	0.171456	0.17154	0	0.128205	0.111392	0.102554	0.092816	0.0948143	0.0948167	0.0949404	0	0	0.00655523	0.00832597	0.0068204	0.00634826	0.00627409	0.00628719	--	--	--	--	--	--	--	--
Brassica oleracea	0.444444	0.178947	0.165217	0.15908	0.167411	0.168991	0.167846	0.167807	0	0.0540541	0.10503	0.0875	0.0941892	0.0959088	0.0958679	0.0957439	0	0.00320513	0.0220354	0.0207189	0.0208085	0.0209679	0.020956	0.0210238	--	--	--	--	--	--	--	--
Canis lupus familiaris	0.0953264	0.095686	0.0959561	0.0846573	0.0763723	0.05	0.181818	0.095433	--	--	--	--	--	--	--	--	--	--	--	--	--	--	--	--	0	0	0.000580889	0.00476714	0.00320303	0.00337393	0.00324952	0.00323576
Capsella rubella	0.428571	0.08	0.0929752	0.083636	0.074742	0.0773756	0.0773982	0.0774484	0.125	0.0487805	0.0190217	0.0264	0.0277179	0.0289835	0.0289815	0.0290436	0	0.16	0.457542	0.414165	0.419598	0.426517	0.427383	0.427771	--	--	--	--	--	--	--	--
Chlamydomonas reinhardtii	0.125	0.132353	0.117483	0.107831	0.116142	0.114605	0.115248	0.115478	0.125	0.225	0.340909	0.301215	0.309094	0.307162	0.306986	0.307153	0	0	0.00325262	0.00247809	0.00315032	0.0032918	0.0033421	0.00335061	--	--	--	--	--	--	--	--
Chlorella NC64A	0.6	0.323529	0.315543	0.357381	0.362533	0.365605	0.365311	0.365356	0	0	0.00848485	0.0122609	0.0140153	0.0142242	0.0141099	0.0141124	0.0961538	0.0230263	0.0172678	0.0129957	0.0124664	0.012944	0.0129665	0.0129294	--	--	--	--	--	--	--	--
Ciona intestinalis	0	0.0434783	0.0670611	0.0822074	0.0849624	0.083796	0.0845533	0.0842978	--	--	--	--	--	--	--	--	--	--	--	--	--	--	--	--	--	--	--	--	--	--	--	--
Coprinopsis cinerea	0	0.116279	0.0457018	0.061983	0.0642764	0.0640733	0.0638559	0.0638682	--	--	--	--	--	--	--	--	--	--	--	--	--	--	--	--	--	--	--	--	--	--	--	--
Cryptococcus neoformans (WT)	0	0	0.00810811	0.00872224	0.00788628	0.00816838	0.00817379	0.00807602	--	--	--	--	--	--	--	--	--	--	--	--	--	--	--	--	--	--	--	--	--	--	--	--
Cyanidioschyzon merolae	0	0	0.00283286	0.00175648	0.00175564	0.00176053	0.00176348	0.00178097	0	0	0	0.000718243	0.0015267	0.00153001	0.00154428	0.00155247	0	0	0	0.000426682	0.000921979	0.00092908	0.000932437	0.00093033	--	--	--	--	--	--	--	--
Drosophila melanogaster	0	0	0.00124069	0.00199601	0.0014336	0.00160749	0.00165651	0.00164418	--	--	--	--	--	--	--	--	--	--	--	--	--	--	--	--	--	--	--	--	--	--	--	--
Emiliania huxleyi	0	0.0647482	0.0996785	0.0885191	0.0910365	0.091699	0.0919508	0.0918976	0	0	0.0260116	0.0252949	0.0292308	0.0301229	0.0301819	0.0302136	0	0.00440529	0.00292826	0.00342086	0.00307161	0.00291885	0.00288934	0.00291901	--	--	--	--	--	--	--	--
Fragilariopsis cylindrus	0	0.0458716	0.0205607	0.028835	0.0242556	0.0252474	0.0253657	0.0254242	0	0	0.00128535	0.00115845	0.00158346	0.00178616	0.00175441	0.00174199	0	0.0045045	0.00188679	0.00190675	0.00143303	0.00143934	0.00145508	0.00149316	--	--	--	--	--	--	--	--
Glycine max	0.142857	0.0793651	0.21327	0.197903	0.191031	0.18805	0.187785	0.187651	0.428571	0.135593	0.173393	0.164798	0.170332	0.168033	0.168485	0.168785	0.0666667	0.0150943	0.0233333	0.0200715	0.0210823	0.0212564	0.0211942	0.021263	--	--	--	--	--	--	--	--
H1	0	0.103448	0.0867347	0.0861564	0.0905461	0.0901779	0.0905019	0.0905656	--	--	--	--	--	--	--	--	--	--	--	--	--	--	--	--	0	0.0213675	0.00950988	0.0063758	0.00799424	0.00831002	0.00822656	0.00823349
Homo sapiens (fc, 64yr)	0	0.0428571	0.0854342	0.088694	0.0866623	0.0867703	0.0864459	0.0862502	--	--	--	--	--	--	--	--	--	--	--	--	--	--	--	--	0.025641	0.00925926	0.00970874	0.00843925	0.00864108	0.00870362	0.00866036	0.00864415
Homo sapiens (fc, female, 53yr, NeuN, –)	0.25	0.0697674	0.0758706	0.0894383	0.0855906	0.0862984	0.0858373	0.0854674	--	--	--	--	--	--	--	--	--	--	--	--	--	--	--	--	0.02	0.00284091	0.00442824	0.00328407	0.00351806	0.00364331	0.00363638	0.00363052
Homo sapiens (fc, female, 53yr, NeuN, +)	0.166667	0.0875	0.101311	0.102549	0.0980138	0.0980105	0.0981656	0.0980526	--	--	--	--	--	--	--	--	--	--	--	--	--	--	--	--	0	0.0561404	0.0278799	0.0288113	0.0285982	0.0291863	0.0293864	0.0293935
Homo sapiens (fc, fetal)	0	0.233766	0.122517	0.105152	0.0983099	0.0996311	0.0995678	0.0996146	--	--	--	--	--	--	--	--	--	--	--	--	--	--	--	--	0	0.00923077	0.00419085	0.00281788	0.00241855	0.00228927	0.00232888	0.00234502
Homo sapiens (fc, male, 55yr, NeuN, –)	0.0909091	0.0617284	0.0871261	0.0886961	0.0875038	0.0863308	0.0865922	0.0867448	--	--	--	--	--	--	--	--	--	--	--	--	--	--	--	--	0	0.0130548	0.00404858	0.00407368	0.00446583	0.0044547	0.0043998	0.00440012
Homo sapiens (fc, male, 55yr, NeuN, +)	0	0.0833333	0.0795148	0.0930837	0.0879142	0.0887573	0.0887869	0.088706	--	--	--	--	--	--	--	--	--	--	--	--	--	--	--	--	0.025	0.0263158	0.0281258	0.025649	0.0246331	0.0247764	0.024774	0.0247336
Homo sapiens (fc, male, 55yr, tissue)	0.272727	0.0917431	0.0936795	0.0986231	0.0957239	0.0961065	0.0956812	0.0957498	--	--	--	--	--	--	--	--	--	--	--	--	--	--	--	--	0	0.0934256	0.0176036	0.0128869	0.00942177	0.00889699	0.00881308	0.00883405
Homo sapiens (mfg, 12yr)	0.25	0.137931	0.0949868	0.0861622	0.0870911	0.0856384	0.0854118	0.0855625	--	--	--	--	--	--	--	--	--	--	--	--	--	--	--	--	0	0.00763359	0.00540541	0.00598741	0.00733132	0.0072895	0.00718002	0.00720873
Homo sapiens (mfg, 16yr)	0.111111	0.108108	0.0986842	0.0923456	0.086341	0.0870014	0.0871984	0.0871144	--	--	--	--	--	--	--	--	--	--	--	--	--	--	--	--	0.142857	0.015873	0.0129147	0.00921206	0.00881427	0.00842277	0.008336	0.00832702
Homo sapiens (mfg, 25yr)	0.166667	0.0649351	0.0680556	0.0827068	0.0878491	0.0878302	0.0877211	0.0876398	--	--	--	--	--	--	--	--	--	--	--	--	--	--	--	--	0.030303	0.00522193	0.00613027	0.00852873	0.00885841	0.00858675	0.00858585	0.00858742
Homo sapiens (mfg, 2yr)	0	0.0888889	0.077748	0.0787943	0.0842899	0.085048	0.0849504	0.0848412	--	--	--	--	--	--	--	--	--	--	--	--	--	--	--	--	0	0.00290698	0.00729743	0.0067451	0.00628888	0.00636217	0.00636529	0.0063624
Homo sapiens (mfg, 35do)	0	0.0875	0.104	0.0823699	0.0835665	0.0854426	0.0856031	0.0857677	--	--	--	--	--	--	--	--	--	--	--	--	--	--	--	--	0	0	0.00386598	0.00341044	0.00334585	0.00352632	0.00351629	0.00350792
Homo sapiens (mfg, 5yr)	0	0.0897436	0.0851648	0.0845554	0.086769	0.0859153	0.0856077	0.0854244	--	--	--	--	--	--	--	--	--	--	--	--	--	--	--	--	0	0.00519481	0.00309997	0.00551299	0.00593642	0.00619033	0.00611776	0.00612349
HUES6	0	0.0724638	0.0720222	0.09257	0.0911173	0.0918164	0.0915673	0.0916929	--	--	--	--	--	--	--	--	--	--	--	--	--	--	--	--	0	0.00520833	0.0060006	0.00690961	0.00700858	0.00726697	0.00729712	0.0072867
Laccaria bicolor	0.4	0.123457	0.0841709	0.110667	0.0991726	0.101926	0.102608	0.102778	--	--	--	--	--	--	--	--	--	--	--	--	--	--	--	--	--	--	--	--	--	--	--	--
Leishmania major	0.125	0.00724638	0.00438596	0.00876999	0.00733382	0.00706151	0.00716889	0.00715813	0	0	0.00609756	0.00823444	0.00799171	0.00808053	0.00808022	0.00811984	0	0	0.00368834	0.00830192	0.00907224	0.00924917	0.00930996	0.00933565	--	--	--	--	--	--	--	--
Micromonas pusilla	0.0625	0.307692	0.144324	0.116708	0.115941	0.118207	0.117707	0.117656	0	0	0	0.000791318	0.00153262	0.00143291	0.00135482	0.00134933	0	0	0.00146556	0.00148024	0.00319309	0.00215941	0.00219004	0.00218186	--	--	--	--	--	--	--	--
Mimulus guttatus	0.166667	0.236364	0.208421	0.226685	0.22062	0.217296	0.217526	0.21771	0.2	0.194805	0.118741	0.107148	0.114508	0.113398	0.113739	0.114014	0.04	0.0152091	0.0239502	0.0308744	0.0311392	0.0317328	0.0316725	0.0316926	--	--	--	--	--	--	--	--
Mus musculus (bone marrow)	0	0.111111	0.0743322	0.0757559	0.0819013	0.082234	0.0820858	0.0821117	--	--	--	--	--	--	--	--	--	--	--	--	--	--	--	--	0.0277778	0.00348432	0.00265722	0.00294126	0.00238894	0.00237725	0.00236979	0.0023886
Mus musculus (cerebellum)	0	0.0786517	0.0935335	0.101887	0.0973198	0.0950756	0.0944131	0.0944103	--	--	--	--	--	--	--	--	--	--	--	--	--	--	--	--	0	0.0096463	0.00843223	0.00588714	0.00656684	0.00651069	0.00639607	0.00639169
Mus musculus (colon)	0	0.0238095	0.0769231	0.0755486	0.0834011	0.0825184	0.082594	0.0824808	--	--	--	--	--	--	--	--	--	--	--	--	--	--	--	--	0	0	0.00357607	0.00248685	0.00348179	0.00374701	0.00385971	0.00389025
Mus musculus (cortex)	0.25	0.117647	0.0865747	0.0759243	0.0710473	0.0722026	0.0719846	0.0717659	--	--	--	--	--	--	--	--	--	--	--	--	--	--	--	--	0	0.00657895	0.00456751	0.0073579	0.00780949	0.0079022	0.00784575	0.00783291
Mus musculus (fc, 10wk)	0	0.075	0.0815273	0.0905567	0.0909217	0.0908364	0.0906239	0.0905175	--	--	--	--	--	--	--	--	--	--	--	--	--	--	--	--	0	0.00318471	0.00643087	0.0077171	0.00795221	0.007754	0.00769272	0.00771911
Mus musculus (fc, 1wk)	0.333333	0.0888889	0.0949367	0.0809147	0.0776519	0.0777318	0.0784469	0.0783263	--	--	--	--	--	--	--	--	--	--	--	--	--	--	--	--	0	0	0.00240577	0.00339949	0.00273918	0.00254844	0.00255889	0.00256023
Mus musculus (fc, 22mo)	0	0.0571429	0.0990338	0.101467	0.106867	0.106109	0.106072	0.105959	--	--	--	--	--	--	--	--	--	--	--	--	--	--	--	--	0	0	0.0120743	0.00819463	0.00777462	0.0078096	0.00783532	0.00780562
Mus musculus (fc, 2wk)	0	0.0972222	0.0984456	0.0875803	0.0883733	0.0892251	0.0896478	0.0895227	--	--	--	--	--	--	--	--	--	--	--	--	--	--	--	--	0	0	0.00762195	0.00473862	0.00470686	0.0051077	0.00497027	0.00497314
Mus musculus (fc, 4wk)	0.0882353	0.105263	0.0983264	0.0969438	0.0949319	0.0951472	0.095037	0.0950079	--	--	--	--	--	--	--	--	--	--	--	--	--	--	--	--	0	0.00925926	0.0179479	0.01138	0.0099108	0.00976502	0.00984421	0.00988211
Mus musculus (fc, 6wk)	0.307692	0.243243	0.108209	0.0972532	0.0953826	0.09674	0.0960612	0.0960888	--	--	--	--	--	--	--	--	--	--	--	--	--	--	--	--	0	0	0.00990415	0.00822843	0.00805311	0.00840012	0.008389	0.00837145
Mus musculus (fc, female, 12mo, neun, –)	0	0.05	0.102921	0.0941991	0.0928182	0.0940848	0.0944092	0.0945054	--	--	--	--	--	--	--	--	--	--	--	--	--	--	--	--	0	0	0.00413712	0.00298937	0.00346678	0.00340207	0.00342326	0.00342803
Mus musculus (fc, female, 12mo, neun, +)	0	0.1	0.0963542	0.0956951	0.0933742	0.0914046	0.0919761	0.0922279	--	--	--	--	--	--	--	--	--	--	--	--	--	--	--	--	0	0.0192308	0.0107527	0.0103571	0.0102265	0.0101711	0.0102086	0.0101786
Mus musculus (fc, female, 6wk, neun, –)	0.142857	0.101266	0.102886	0.10508	0.10452	0.104023	0.104119	0.104084	--	--	--	--	--	--	--	--	--	--	--	--	--	--	--	--	0	0.00253807	0.00607064	0.0038266	0.00323705	0.00343467	0.00336926	0.00335354
Mus musculus (fc, female, 6wk, neun, +)	0	0.0714286	0.0865747	0.0975338	0.0996632	0.0994918	0.0989174	0.0988456	--	--	--	--	--	--	--	--	--	--	--	--	--	--	--	--	0	0.00817439	0.0123728	0.0109206	0.0103794	0.0103424	0.0103324	0.0103183
Mus musculus (fc, fetal)	0	0.0617284	0.103704	0.108102	0.0983197	0.101466	0.101449	0.101402	--	--	--	--	--	--	--	--	--	--	--	--	--	--	--	--	0	0	0.00234009	0.00233133	0.00216538	0.00223522	0.00225837	0.00226995
Mus musculus (fc, glia, S100b, +)	0.230769	0.123457	0.117805	0.11252	0.119687	0.121295	0.121371	0.121341	--	--	--	--	--	--	--	--	--	--	--	--	--	--	--	--	0	0.022082	0.00902595	0.00845429	0.00869033	0.00874856	0.00881218	0.00882879
Mus musculus (fc, male, 7wk, neun, –)	0.375	0.125	0.117143	0.1202	0.115349	0.116151	0.116157	0.116138	--	--	--	--	--	--	--	--	--	--	--	--	--	--	--	--	0	0.0148148	0.00540541	0.00371992	0.00378425	0.00379519	0.00373657	0.00373221
Mus musculus (fc, male, 7wk, neun, +)	0.153846	0.126582	0.0969945	0.10274	0.112092	0.114546	0.11457	0.114669	--	--	--	--	--	--	--	--	--	--	--	--	--	--	--	--	0	0.00769231	0.00750751	0.0100292	0.0099415	0.00991932	0.00990297	0.00991768
Mus musculus (fc, tet2ko)	0	0.0465116	0.0886243	0.0884979	0.0934764	0.0937775	0.0939126	0.0937575	--	--	--	--	--	--	--	--	--	--	--	--	--	--	--	--	0	0.0115385	0.00581395	0.00792723	0.00742994	0.00695722	0.00694307	0.00695241
Mus musculus (heart)	0	0.0694444	0.0554839	0.0711757	0.0728134	0.0739371	0.0732082	0.0730508	--	--	--	--	--	--	--	--	--	--	--	--	--	--	--	--	0	0	0.00275482	0.00418446	0.00428874	0.00467301	0.00474331	0.00471701
Mus musculus (intestine)	0	0.0609756	0.115995	0.104102	0.102067	0.102396	0.102706	0.102644	--	--	--	--	--	--	--	--	--	--	--	--	--	--	--	--	0	0.00290698	0.0059778	0.00485512	0.00405422	0.00424735	0.00415126	0.00417522
Mus musculus (kidney)	0	0.135135	0.100883	0.0925447	0.0950191	0.096452	0.0966406	0.0965581	--	--	--	--	--	--	--	--	--	--	--	--	--	--	--	--	0	0	0.00485714	0.00411711	0.00475419	0.00503248	0.00500046	0.00495719
Mus musculus (liver)	0	0.03125	0.061745	0.0666667	0.0738344	0.0720367	0.0715885	0.0717614	--	--	--	--	--	--	--	--	--	--	--	--	--	--	--	--	0	0.00319489	0.00327967	0.00401536	0.00408805	0.00389429	0.00386795	0.00389782
Mus musculus (lung)	0	0.037037	0.0542099	0.0829446	0.0873839	0.0864991	0.0865807	0.0865534	--	--	--	--	--	--	--	--	--	--	--	--	--	--	--	--	0	0	0.00757355	0.00335766	0.00333594	0.00315802	0.00314026	0.00313774
Mus musculus (olfactory bulb)	0	0.0909091	0.0639053	0.0778074	0.0806465	0.0814138	0.0810572	0.0811175	--	--	--	--	--	--	--	--	--	--	--	--	--	--	--	--	0	0.00303951	0.00427611	0.00808741	0.00733835	0.00723126	0.00719705	0.00719024
Mus musculus (pancreas)	0	0.0533333	0.100711	0.0961283	0.0944625	0.0940488	0.0942306	0.0943689	--	--	--	--	--	--	--	--	--	--	--	--	--	--	--	--	0	0.00554017	0.00548446	0.00576644	0.0062559	0.00584688	0.00583948	0.00583827
Mus musculus (placenta)	0	0.122807	0.0479549	0.0489721	0.0525668	0.0517634	0.0512238	0.0512248	--	--	--	--	--	--	--	--	--	--	--	--	--	--	--	--	0	0	0.00277104	0.00478469	0.00394663	0.00352538	0.00351644	0.00353585
Mus musculus (skin)	0.1	0.0833333	0.0763984	0.0783133	0.0764067	0.0780542	0.0785196	0.0784072	--	--	--	--	--	--	--	--	--	--	--	--	--	--	--	--	0	0	0.00266756	0.00359688	0.00421537	0.00410648	0.00406672	0.00406918
Mus musculus (spleen)	0	0.09375	0.0823137	0.0846216	0.0804413	0.0796275	0.0796233	0.0796808	--	--	--	--	--	--	--	--	--	--	--	--	--	--	--	--	0	0	0.00326797	0.00324503	0.00259833	0.0026169	0.00266452	0.00266511
Mus musculus (stomach)	0.142857	0.0704225	0.0808824	0.100953	0.0923792	0.0929289	0.0925236	0.0923329	--	--	--	--	--	--	--	--	--	--	--	--	--	--	--	--	0	0.00350877	0.00617284	0.00478196	0.00458444	0.00509773	0.00499688	0.00500803
Mus musculus (thymus)	0	0.0634921	0.0947503	0.108013	0.103656	0.103149	0.103053	0.102912	--	--	--	--	--	--	--	--	--	--	--	--	--	--	--	--	0	0.0181347	0.00403978	0.00512148	0.00352636	0.0035781	0.00365193	0.00365179
Mus musculus (uterus)	0	0.0581395	0.0962963	0.092537	0.0930187	0.0899856	0.089705	0.0895624	--	--	--	--	--	--	--	--	--	--	--	--	--	--	--	--	0	0.0033557	0.00380952	0.00383095	0.00416911	0.00419931	0.00423712	0.00423193
Nasonia vitripennis	0	0	0.00363306	0.00513047	0.00473412	0.00460551	0.00474306	0.00474623	--	--	--	--	--	--	--	--	--	--	--	--	--	--	--	--	--	--	--	--	--	--	--	--
Nematostella vectensis	0	0.0425532	0.0193798	0.0345993	0.030228	0.0287398	0.0284745	0.0283224	--	--	--	--	--	--	--	--	--	--	--	--	--	--	--	--	--	--	--	--	--	--	--	--
Oryza sativa	0.727273	0.230769	0.259762	0.266679	0.276759	0.28075	0.280144	0.280368	0	0.266667	0.184066	0.189093	0.196056	0.193548	0.193982	0.194158	0	0.011236	0.0462185	0.0364087	0.0350706	0.0341243	0.0345528	0.0345522	--	--	--	--	--	--	--	--
Ostreococcus lucimarinus	0	0.121547	0.166667	0.143234	0.145554	0.147476	0.147713	0.147564	0	0	0.00235294	0.00171487	0.00152742	0.00149279	0.00143213	0.00142936	0	0	0.000967586	0.00209368	0.00183756	0.00219207	0.00208663	0.00206141	--	--	--	--	--	--	--	--
Phaeodactylum tricornutum	0	0.00793651	0.00484262	0.00820456	0.0101448	0.0103975	0.0104184	0.0103601	0	0	0	0.00144076	0.00156774	0.00155081	0.0015519	0.00154701	0	0.00332226	0.00109529	0.00225522	0.00220189	0.00183465	0.0018119	0.00180361	--	--	--	--	--	--	--	--
Phycomyces blakesleeanus	0.111111	0.0757576	0.0357143	0.0398717	0.0418071	0.0410634	0.0411706	0.041368	--	--	--	--	--	--	--	--	--	--	--	--	--	--	--	--	--	--	--	--	--	--	--	--
Physcomitrella patens	0	0.166667	0.0639854	0.0647941	0.0673475	0.0669488	0.0669908	0.0672058	0	0.150943	0.0650224	0.0827277	0.086566	0.0851725	0.0847451	0.0851277	0.166667	0.0961538	0.0777293	0.0825029	0.0882841	0.0865188	0.0862196	0.0863863	--	--	--	--	--	--	--	--
Populus trichocarpa	0.2	0.0606061	0.0521739	0.0834413	0.0937221	0.0958736	0.0959425	0.0958997	0	0.104167	0.1	0.100789	0.101952	0.10517	0.105884	0.10597	0.04	0.015748	0.0163108	0.0180466	0.018619	0.0188209	0.0187702	0.018805	--	--	--	--	--	--	--	--
Postia placenta	0	0	0.0905263	0.0666806	0.0697384	0.0700662	0.0697332	0.0699543	--	--	--	--	--	--	--	--	--	--	--	--	--	--	--	--	--	--	--	--	--	--	--	--
Selaginella moellendorffii	0.25	0.0632911	0.0318681	0.0410417	0.0467373	0.0490688	0.0488318	0.0489469	0.5	0.0892857	0.039604	0.0375465	0.039071	0.0396043	0.0398472	0.0399389	0	0.00588235	0.00220386	0.00406964	0.00652049	0.00674224	0.00665953	0.0068992	--	--	--	--	--	--	--	--
Solanum lycopersicum	0	0.169811	0.169872	0.181223	0.188295	0.186537	0.186499	0.186576	0.25	0.141026	0.16318	0.163539	0.163349	0.163117	0.164146	0.164147	0.0243902	0.0391459	0.0400913	0.0341636	0.0333341	0.0325993	0.0326197	0.0326277	--	--	--	--	--	--	--	--
Sorghum bicolor	0	0.158879	0.184995	0.194569	0.193173	0.188665	0.188791	0.188817	0	0.0789474	0.141319	0.156112	0.149168	0.14607	0.146548	0.146878	0	0.00634921	0.012492	0.0134688	0.0119576	0.0119249	0.0121038	0.0121362	--	--	--	--	--	--	--	--
Tetraodon nigroviridis	0	0.265823	0.208485	0.203091	0.205803	0.206665	0.206306	0.205996	--	--	--	--	--	--	--	--	--	--	--	--	--	--	--	--	--	--	--	--	--	--	--	--
Thalassiosira pseudonana	0	0.0285714	0.0079929	0.0133666	0.0127067	0.0128459	0.0131159	0.0131076	0	0	0.00117786	0.000490617	0.00105351	0.00110614	0.00112779	0.0011308	0	0	0.00153965	0.000936365	0.00150302	0.00150653	0.00151153	0.00151004	--	--	--	--	--	--	--	--
Uncinocarpus reesii	0	0	0.00246914	0.00460887	0.00439683	0.00467191	0.00457909	0.004511	--	--	--	--	--	--	--	--	--	--	--	--	--	--	--	--	--	--	--	--	--	--	--	--
Volvox carteri	0	0	0.0155039	0.0121366	0.0129628	0.0132225	0.0130736	0.0129901	0	0	0.00277008	0.00269651	0.00222541	0.00203219	0.00217681	0.00218283	0	0	0.00335121	0.00257516	0.00438502	0.00397138	0.00464047	0.00444573	--	--	--	--	--	--	--	--
Zea mays	0.357143	0.308411	0.425871	0.415113	0.414916	0.416938	0.415968	0.415859	0	0.287671	0.39645	0.406067	0.411276	0.415008	0.415088	0.415182	0	0.0126582	0.0234623	0.0290543	0.0278132	0.0266049	0.0262281	0.0261687	--	--	--	--	--	--	--	--

## Sheet: A. thaliana sampling
Replicate	Predicted CpG DNA methylation level	Confidence interval
1	0.328924	0.2997428-0.3581047
2	0.330944	0.3017161-0.3601714
3	0.330216	0.3010053-0.3594265
4	0.327199	0.2980566-0.3563415
5	0.314018	0.2851288-0.3429069
6	0.333713	0.3044186-0.3630073
7	0.328747	0.2995704-0.3579243
8	0.320879	0.291867-0.3498907
9	0.332141	0.3028854-0.3613976
10	0.333342	0.3040563-0.3626267
11	0.328734	0.299557-0.3579103
12	0.32609	0.2969714-0.355208
13	0.324014	0.2949398-0.3530889
14	0.321863	0.2928317-0.3508938
15	0.338655	0.3092334-0.3680758
16	0.323839	0.2947683-0.3529102
17	0.327724	0.2985704-0.3568785
18	0.317763	0.2888093-0.3467165
19	0.330137	0.3009285-0.3593461
20	0.325414	0.2963098-0.3545175

## Sheet: Contamination
# of chloroplast reads	met1	met1(+/-)	MET1 (+/+)	Arabidopsis thaliana
1	0.00849748	0.0612947	0.0716012	0.100229
10	0.00847969	0.0612572	0.0716146	0.100139
20	0.00848612	0.0612267	0.0715789	0.0999821
30	0.00849042	0.0612663	0.0715521	0.0999363
40	0.00848645	0.0611085	0.0714464	0.0998985
50	0.00851271	0.0610963	0.0713854	0.0997731
60	0.00854518	0.0610875	0.0712664	0.0997093
70	0.0084366	0.0609475	0.0711174	0.0996774
80	0.00841974	0.0609652	0.071165	0.0994705
90	0.00846136	0.0608984	0.0710011	0.0994005
100	0.00836992	0.0607757	0.070909	0.0993565
200	0.0083449	0.0602982	0.0704396	0.0985015
300	0.00830867	0.0598624	0.0694095	0.0976864
400	0.00817465	0.0593679	0.0689677	0.0971316
500	0.00812896	0.0587199	0.0682974	0.0963996
600	0.008128	0.0582892	0.0683323	0.095546
700	0.00809765	0.0577938	0.06742	0.0946717
800	0.00813008	0.0571965	0.0668996	0.0938309
900	0.00816464	0.0571663	0.0662713	0.0924588
1000	0.00822857	0.0562165	0.0658468	0.0914174
2000	0.00763701	0.0513315	0.0603978	0.0838018
3000	0.00736089	0.0455162	0.0549061	0.0754089
4000	0.00730285	0.0399145	0.0484517	0.0663579
5000	0.0069604	0.0347722	0.0423	0.0560808

[truncated: 1 more sheets: Non-conversion]
